# Supplementary material for: A highly sulfite-selective ratiometric fluorescent probe based on ESIPT
Source: Royal Society of Chemistry journal article supplement (doi:10.1039/c2ra21471g), 2012-01-01
Supplement: c2ra21471g.pdf [file c2ra21471g.pdf]

**Electronic supplementary information (ESI)**

**A highly sulfite-selective ratiometric fluorescent probe based on  
ESIPT**

**Song Chen<sup>1,2</sup>, Peng Hou<sup>1,2</sup>, Jianxiu Wang<sup>1,2</sup> and Xiangzhi Song<sup>1,2,3\*</sup>**

*1. College of Chemistry & Chemical Engineering, Central South University; 2. Key Laboratory of Resource Chemistry of Nonferrous Metals, Ministry of Education; 3. State Key Laboratory for Powder Metallurgy;*

*932 Lushan South Road, Changsha, Hunan Province, P. R. China, 410083*

*Corresponding author: X. S., Telephone: +86-731-88836954,*

*Fax: +86-731-88836954, Email: xzsong@csu.edu.cn*

***Table of contents***

- 1. Fluorescence spectrum of probe 1 in CH<sub>3</sub>CN solution .**
- 2. The time-dependent fluorescence of probe 1 in acetonitrile-buffer solution (pH =7.4)**
- 3. Fluorescence spectra of probe 1 in response to bisulfate ion**
- 4. <sup>1</sup>H NMR spectrum of probe 1**
- 5. LC-MS spectrum of probe 1**

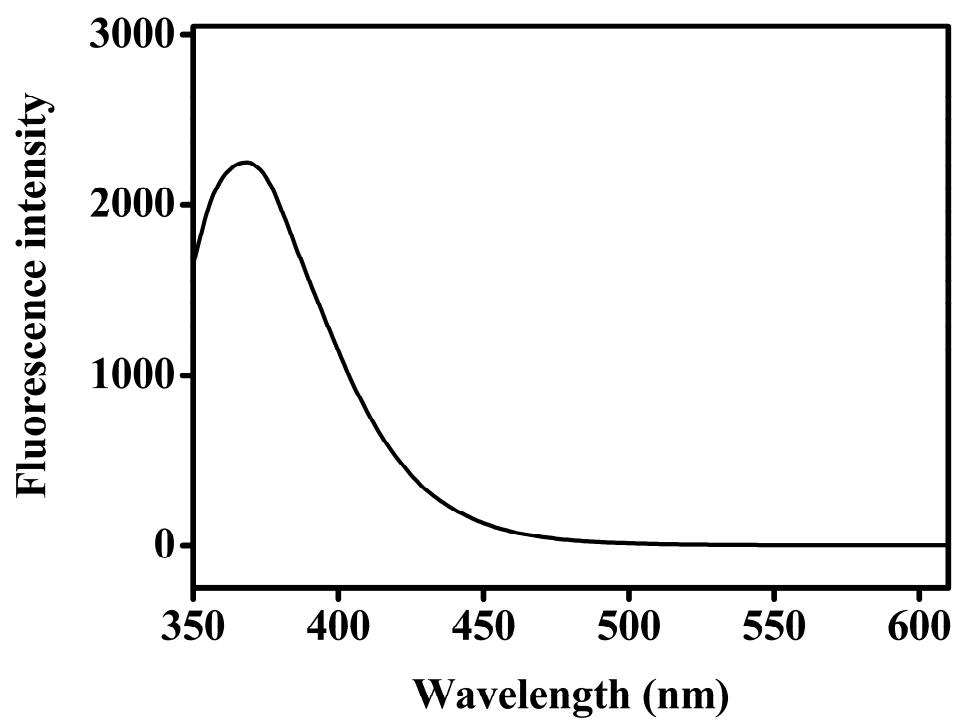

**Fig. S1.** Fluorescence spectrum of probe 1 ( $\lambda_{ex} = 310$  nm,  $10\mu\text{M}$ ) in  $\text{CH}_3\text{CN}$  solution .

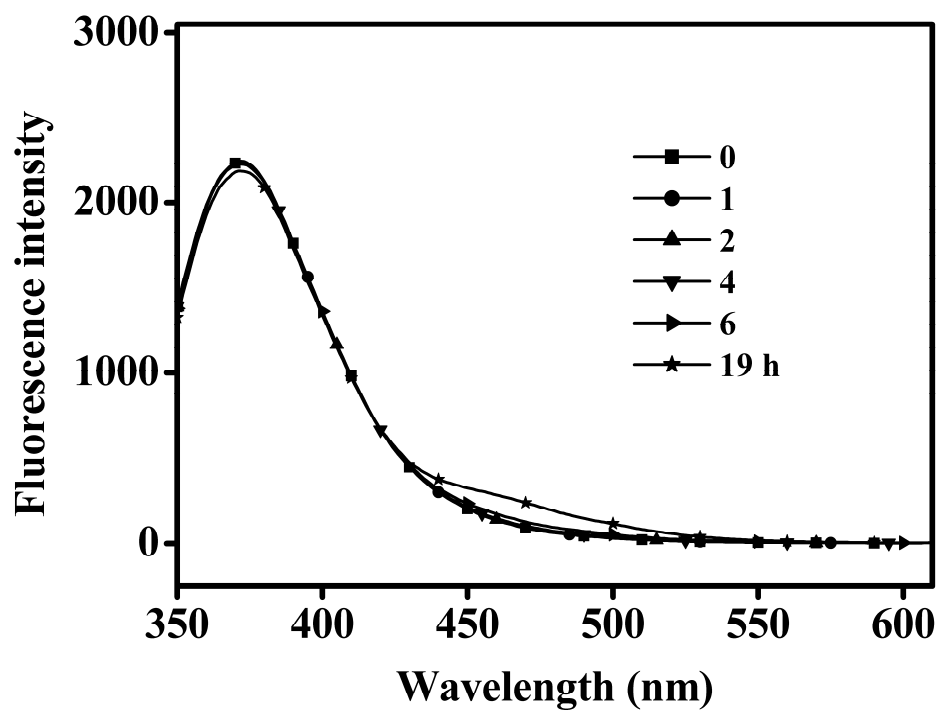

Fig. S2 The time-dependent fluorescence of probe 1 in  
HEPES buffered (pH 7.4, 10 mM) H<sub>2</sub>O-CH<sub>3</sub>CN (50%, V/V).

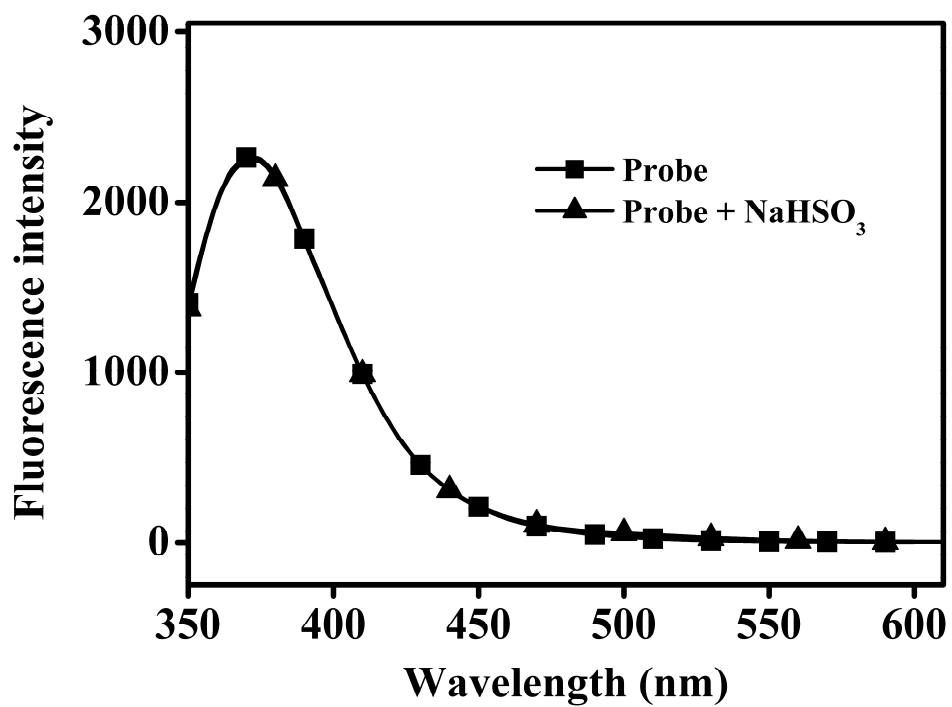

**Fig. S3** Fluorescence spectra of probe 1 (10  $\mu$ M) in response to bisulfate ion in PBS buffered (pH 4.8, 50 mM) H<sub>2</sub>O-CH<sub>3</sub>CN (50%, V/V).

CS

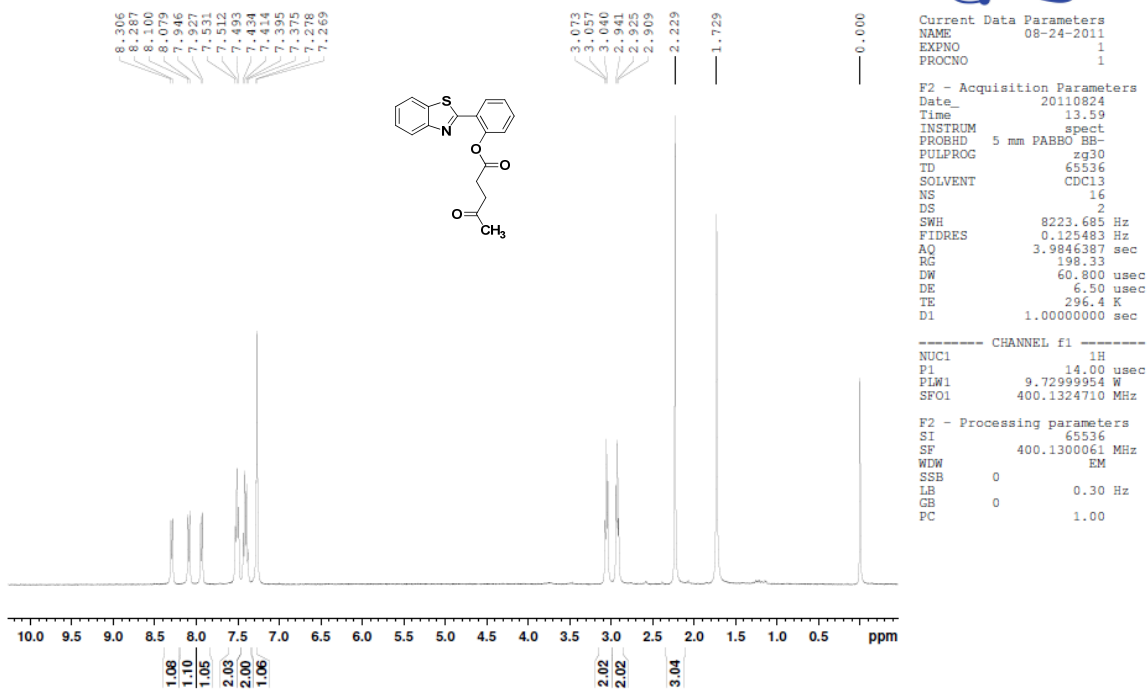

Fig. S4.  $^1\text{H}$  NMR spectrum of 1 in  $\text{CDCl}_3$

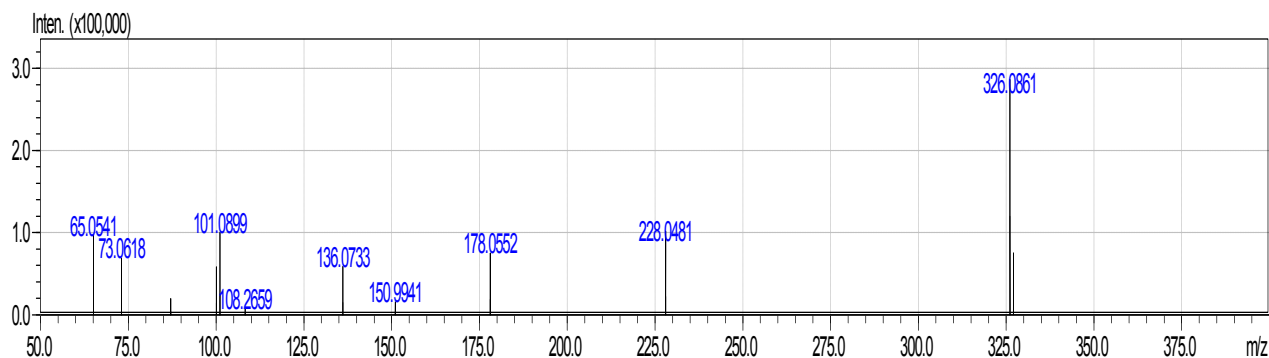

Fig. S5. LC-MS spectrum of 1 in positive ion mode
